# Supplementary material
Source: PubMed Central journal article supplement (PMC5540847)
Supplement: NIHMS851820-supplement-1.pdf [file NIHMS851820-supplement-1.pdf]

## Supplementary Materials

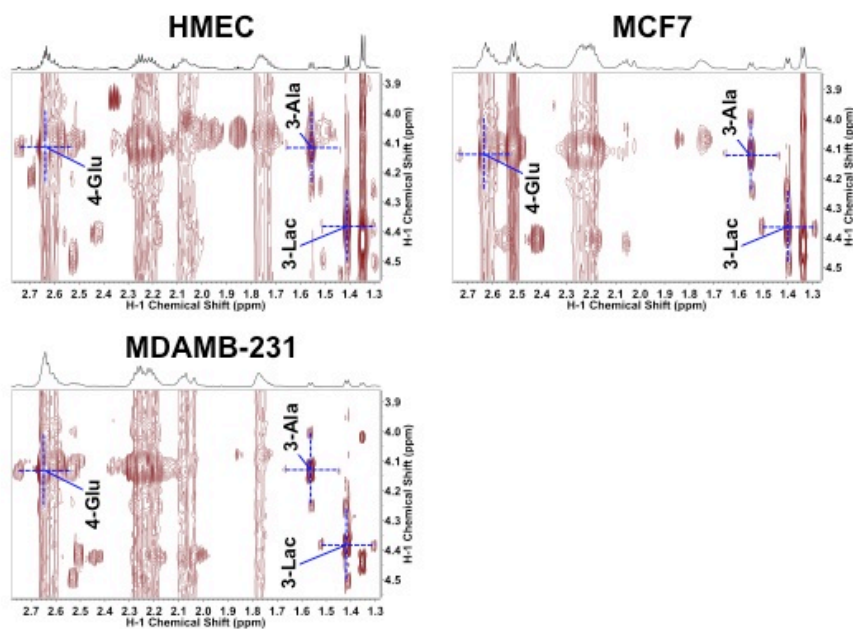

**Figure S1. 2D  $^1\text{H}$  TOCSY Spectra of three breast cell lines grown in the presence of  $^{13}\text{C}$ -1-+ $^{13}\text{C}$ -2-glucose reveal differential capacity for oxidative and non-oxidative branches of the pentose phosphate pathway. TCA extracts were prepared from cells grown for 24 h in the presence of  $^{13}\text{C}$ -1-+ $^{13}\text{C}$ -2 glucose.  $^{13}\text{C}$  labeling patterns in lactate (Lac), Ala, and Glu.**

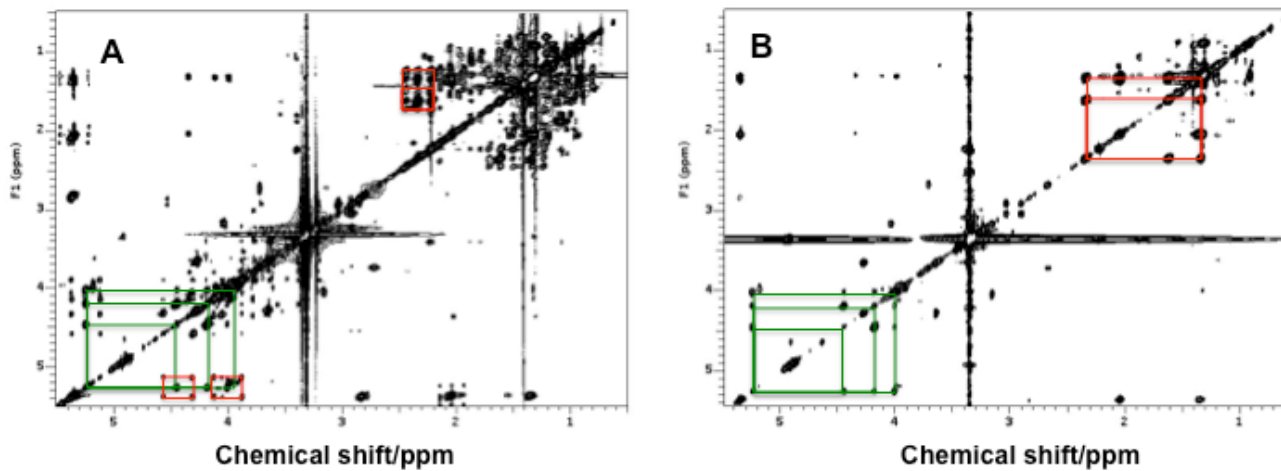

**Figure S2. TOCSY spectra of lipid extracts of HMEC cells.**

Cells were grown in the presence of labeled precursors for 24 h. The lipid fractions of the cell extracts were dissolved in d4-methanol and analyzed by TOCSY recorded at 14.1 T with an isotropic mixing time of 50 ms and a B<sub>1</sub> field strength of 8 kHz.

A. 5 mM [U-<sup>13</sup>C]-glucose + 2 mM [<sup>12</sup>C,<sup>14</sup>N]-Gln

B. 5 mM <sup>12</sup>C]-glucose + 2 mM [U-<sup>13</sup>C,<sup>15</sup>N]-Gln

Glucose-derived carbon was incorporated into the glycerol and fatty acyl chains of the lipids, whereas whereas glutamine carbon was not incorporated significantly into either component.

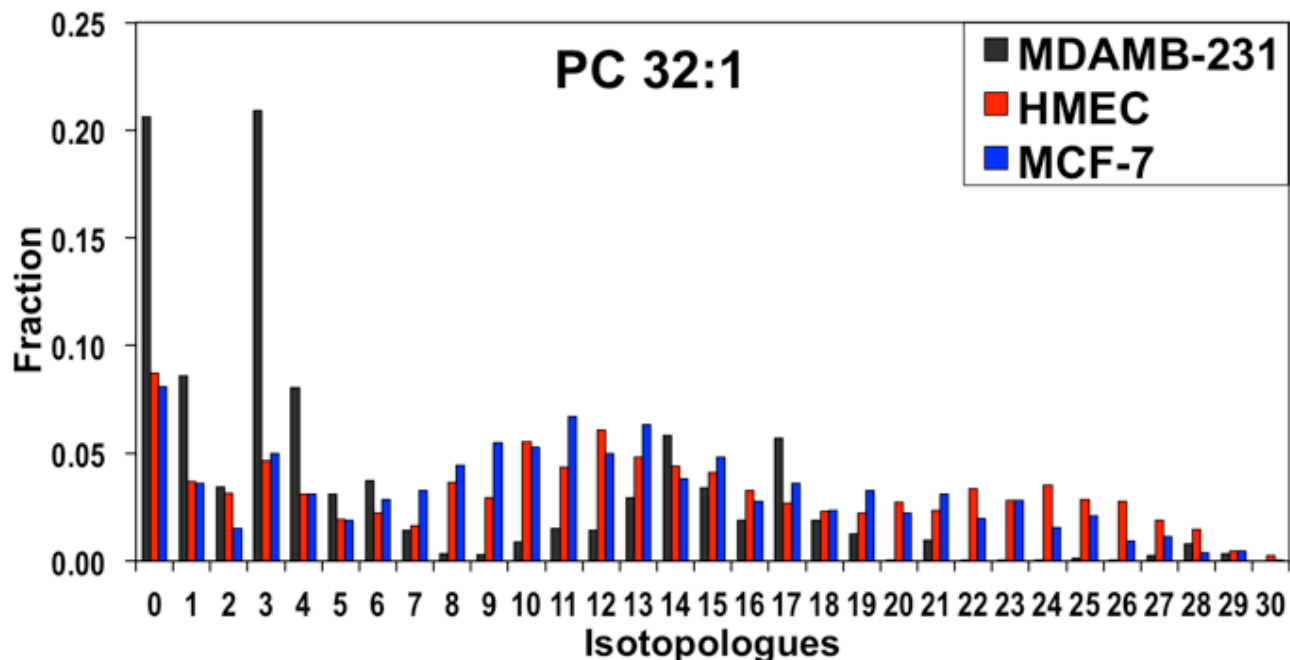

**Figure S3. Isotopologue Distributions for PC 32 :1 in three cell lines by FT-ICR-MS**

The isotopologues for PC 32 :1 +H were extracted from the FT-ICR-MS data using PREMISE (Lane, Fan et al. 2009) for the three cell lines grown in the presence of [U-<sup>13</sup>C]-glucose. The total enrichment in this lipid was considerably lower in MDA-MB-231 than in either MCF-7 or HMEC (cf. m0 intensity), and was dominated by the glycerol labeling (m+3) with low labeling in the fatty acyl chains. The net <sup>13</sup>C incorporation into PC 32 :1 in HMEC and MCF-7 was similar, and showed extensive labeling of the fatty acyl chains.

Lane, A. N., T. W.-M. Fan, X. Xie, H. N. Moseley and R. M. Higashi (2009). "Stable isotope analysis of lipid biosynthesis by high resolution mass spectrometry and NMR " *Anal. Chim. Acta* **651**: 201-208.
